# Supplementary material
Source: PubMed Central journal article supplement (PMC8288109)
Supplement: NIHMS1720010-supplement-Supplementary_material.pdf [file NIHMS1720010-supplement-Supplementary_material.pdf]

## Patterns of Initial Prescription Opioid Supply and Risk of Mortality Among Insured Adults in the United States

**Authors:** Hilary A. Aroke, MD PhD MS,<sup>1</sup> Ashley L. Buchanan, DrPH MS,<sup>1</sup> Jeffrey Bratberg, PharmD,<sup>1</sup> Joseph W. Hogan, ScD,<sup>2</sup> Josiah D. Rich, MD MPH,<sup>3</sup> Xuerong Wen, PhD MS,<sup>1</sup> Stephen J. Kogut, PhD MBA RPh<sup>1</sup>  
**Affiliations**

<sup>1</sup>Department of Pharmacy Practice, College of Pharmacy, University of Rhode Island, Kingston, Rhode Island, USA

<sup>2</sup>Department of Biostatistics, Brown University School of Public Health, Providence, Rhode Island, USA

<sup>3</sup>The Warren Alpert Medical School of Brown University, Providence, Rhode Island, USA

### Online Supplement

#### Table of Contents for Online Supplement

1. eTable 1: A Summary of the Protocol of a Target Trial to Estimate the Causal Effects of Initial pattern of Prescription Opioid Supply on the One-Year Risk of all-cause Mortality among Insured Adults in the United States, 2010-2015.
2. eTable 2. Current Procedural Terminology (CPT) and *International Classification of Diseases, Ninth Revision* (ICD-9) codes for surgical procedures
3. eTable 3. ICD-9 codes for Pain diagnoses
4. eTable 4. ICD-9 codes for Fractures and Strains
5. eTable 5. ICD-9 codes for Mental health disorders
6. eTable 6. ICD-9 codes for substance use disorders
7. eTable 7. List of Medical Comorbidities and ICD-9 Codes used
8. eTable 8. Rates of selected conditions diagnosed within 6 months of death by initial pattern of prescription opioid supply among 15,630 decedents in the study cohort.
9. eTable 9. Categories of medical claims during the last 6 months prior to death.
10. eFigure 10. Study timeline for patients selected into the study cohort.
11. eFigure 11. Complementary log-log plot for the two patterns of prescription opioid supply showing parallel curves separated by a constant at all time points during follow-up.

**eTable 1: A Summary of the Protocol of a Target Trial<sup>a</sup> to Estimate the Causal Effects of Initial pattern of Prescription Opioid Supply on the one-Year Risk of all-cause Mortality among Insured Adults in the United States, 2010-2015.**

| Protocol Component          | Description                                                                                                                                                                                                                                                                                                       |
|-----------------------------|-------------------------------------------------------------------------------------------------------------------------------------------------------------------------------------------------------------------------------------------------------------------------------------------------------------------|
| Eligibility criteria        | Opioid-naïve adults with no claims for cancer or hospice services in the past year (6 months before the first opioid prescription [baseline period] and 6 month after opioid initiation [index period]) and no opioid use disorder diagnosis at baseline.                                                         |
| Treatment strategies        | Initiate and take prescription opioids daily versus non-daily as defined during the index period and remain on it during follow-up unless adverse events occur                                                                                                                                                    |
| Assignment procedures       | Patients randomly assigned to either daily or nondaily opioid use during the index period and will be aware of the strategy to which they have been assigned.                                                                                                                                                     |
| Follow-up period            | Starts at the end of the index period and ends with death, loss of enrolment or 5 years after index period, whichever occurs first                                                                                                                                                                                |
| Outcome                     | All-cause mortality within 1 year as captured in the Social Security Administration Death Master file.                                                                                                                                                                                                            |
| Causal contrast of interest | Intention-to-treat effect                                                                                                                                                                                                                                                                                         |
| Analysis plan               | Intention-to-treat effect estimated via comparison of 1-year all-cause mortality risks among individuals assigned to each treatment strategy. All analyses were adjusted for baseline/index prognostic factors associated with exposure and outcome. Covariates included in the analysis were specified a priori. |

<sup>a</sup>Hernán, M.A. and Robins, J.M. Using Big Data to Emulate a Target Trial When a Randomized Trial Is Not Available. *American Journal of Epidemiology*, 2016; 183(8): 758–764. <https://doi.org/10.1093/aje/kwv254>

**eTable 2. Current Procedural Terminology (CPT) and International Classification of Diseases, Ninth Revision (ICD-9) codes for surgical procedures**

| Surgical procedures          | CPT codes                                                            |
|------------------------------|----------------------------------------------------------------------|
| Total Knee Arthroplasty      | 27447                                                                |
| Total Hip Arthroplasty       | 27130                                                                |
| Laparoscopic Cholecystectomy | 47562, 47563, 47564                                                  |
| Open Cholecystectomy         | 47600, 47605, 47610                                                  |
| Laparoscopic Appendectomy    | 44970, 44979                                                         |
| Open Appendectomy            | 44950, 44960                                                         |
| Cesarean Section             | 59510, 59514, 59515                                                  |
| FESS                         | 31237, 31240, 31254, 31255, 31256, 31267, 31276, 31287, 31288        |
| Cataract Surgery             | 66982, 66983, 66984                                                  |
| TURP                         | 52601, 52612, 52614, 52480, 52630                                    |
| Simple Mastectomy            | 19301, 19302, 19303, 19180                                           |
| Carpal tunnel release        | 64721                                                                |
| Parathyroidectomy            | 60500                                                                |
| Varicose veins               | 37785                                                                |
| Hemorrhoidectomy             | 46221, 46945, 46946, 46250, 46260, 46257, 46258, 46261, 46262, 46255 |
| Thyroidectomy                | 60240                                                                |
| Surgical procedures          | ICD-9codes                                                           |
| Gastric procedures           | 4498, 4464, 4495, 4438, 4468, 4382, 4439                             |
| Incisional hernia repair     | 5351, 5362, 5359                                                     |
| Esophagus                    | 4495, 4466                                                           |
| Diaphragm                    | 5362, 5371, 5383, 5372, 5361, 5384, 5369, 5363, 5375, 5380           |
| Colon                        | 4581, 4573, 4582, 4583                                               |
| Uterus                       | 6831, 6841, 6851, 6839, 6849, 689                                    |

FESS=Functional endoscopic sinus surgery, TURP=transurethral resection of the prostate

eTable 3. Pain diagnoses

| Pain disorder category | ICD-9 codes                                                                                                                                                                                                                                                                                                                                                                                                                                                                                                     |
|------------------------|-----------------------------------------------------------------------------------------------------------------------------------------------------------------------------------------------------------------------------------------------------------------------------------------------------------------------------------------------------------------------------------------------------------------------------------------------------------------------------------------------------------------|
| Headache/migraines     | '3840', '3502', '34000', '346', '3460', '3461', '3462', '3463', '3464', '3465', '3466', '3467', '3468', '34600', '34601', '34602', '34603', '34610', '34611', '34612', '34613', '34620', '34621', '34622', '34623', '34630', '34631', '34632', '34633', '34640', '34641', '34642', '34643', '34650', '34651', '34652', '34653', '34660', '34661', '34662', '34663', '34670', '34671', '34672', '34673', '34680', '34681', '34682', '34683', '34690', '34691', '34692', '34693', '30781', '7840', '7238', '3469' |
| Neck/TMJ               | '72231', '72271', '72281', '72291', '8390', '8391', '8470', '7210', '7211', '7220', '723', '52460', '52461', '52462', '52463', '52464', '52469'                                                                                                                                                                                                                                                                                                                                                                 |
| Back                   | '72230', '72232', '72233', '72270', '72272', '72273', '72280', '72282', '72283', '72290', '72292', '72293', '7371', '7373', '7384', '7385', '7392', '7393', '7394', '75610', '75611', '75612', '75619', '8054', '8058', '8392', '83942', '846', '8460', '8471', '8472', '8473', '8479', '75613', '7222', '724', '7213' - '7219'                                                                                                                                                                                 |
| Abdominal pain         | '7890', '78900', '78901', '78902', '78903', '78904', '78905', '78906', '78907', '78909', '78960', '78961', '78962', '78963', '78964', '78965', '78966', '78967', '78969', '5920', '5921', '5929', '5940', '5941', '5942', '5948', '5949', '7880', 'V1301'                                                                                                                                                                                                                                                       |
| Joint/arthritis pain   | '710', '7101', '7103', '7104', '734', '725', '7105', '7108', '7109', '729', '7292', '7294', '7295', '7296', '737', '7378', '7379', '738', '7382', '7383', '7386', '7387', '7388', '7389', '739', '7391', '7395', '7396', '7397', '7398', '7399', '711', '712', '713', '714', '715', '716', '717', '718', '719', '726', '727', '728', '7293', '7297', '7298', '7299', '730', '731', '732', '733', '735', '736', '7372', '7374', '7381'                                                                           |
| Fibromyalgia/CFS       | '7291', '78071'                                                                                                                                                                                                                                                                                                                                                                                                                                                                                                 |
| Chronic pain syndrome  | '3380', '3382', '3384', '339', '346', '30781', '7840', '805', '806', '846', '847', '3502', '3540', '3544', '3555', '35571', '377', '3370' - '33719', '356', '357', '710' - '719', '720' - '724', '725' - '729', '731' - '738'                                                                                                                                                                                                                                                                                   |
| Other pain conditions  | '78659', '5305', '5368', '7102', '3883', '5951', '564', '6257', '617'                                                                                                                                                                                                                                                                                                                                                                                                                                           |

TMJD=Temporal-mandibular joint disorder, CFS=Chronic fatigue syndrome, CPS=chronic pain syndrome; ICD-9= *International Classification of Diseases, Ninth Revision*

Adapted from: HCUP CCS. Healthcare Cost and Utilization Project (HCUP). March 2017. Agency for Healthcare Research and Quality, Rockville, MD. [www.hcup-us.ahrq.gov/toolssoftware/ccs/ccs.jsp](http://www.hcup-us.ahrq.gov/toolssoftware/ccs/ccs.jsp). Accessed on 1/12/2018.

**eTable 4. Other pain conditions: ICD-9 codes for Fractures and Strains**

|         |         |         |         |         |         |         |         |         |         |         |         |         |         |
|---------|---------|---------|---------|---------|---------|---------|---------|---------|---------|---------|---------|---------|---------|
| '81000' | '81001' | '81002' | '81003' | '81010' | '81011' | '81012' | '81013' | '81100' | '81101' | '81102' | '81103' | '81109' | '81110' |
| '81111' | '81112' | '81113' | '81119' | '81200' | '81201' | '81202' | '81203' | '81209' | '81210' | '81211' | '81212' | '81213' | '81219' |
| '81220' | '81221' | '81230' | '81231' | '81240' | '81241' | '81242' | '81243' | '81244' | '81249' | '81250' | '81251' | '81252' | '81253' |
| '81254' | '81259' | '81300' | '81301' | '81302' | '81303' | '81304' | '81305' | '81306' | '81307' | '81308' | '81310' | '81311' | '81312' |
| '81313' | '81314' | '81315' | '81316' | '81317' | '81318' | '81320' | '81321' | '81322' | '81323' | '81330' | '81331' | '81332' | '81333' |
| '81340' | '81341' | '81342' | '81343' | '81344' | '81345' | '81346' | '81347' | '81350' | '81351' | '81352' | '81353' | '81354' | '81380' |
| '81381' | '81382' | '81383' | '81390' | '81391' | '81392' | '81393' | '81400' | '81401' | '81402' | '81403' | '81404' | '81405' | '81406' |
| '81407' | '81408' | '81409' | '81410' | '81411' | '81412' | '81413' | '81414' | '81415' | '81416' | '81417' | '81418' | '81419' | '81500' |
| '81501' | '81502' | '81503' | '81504' | '81509' | '81510' | '81511' | '81512' | '81513' | '81514' | '81519' | '81600' | '81601' | '81602' |
| '81603' | '81610' | '81611' | '81612' | '81613' | '8170'  | '8171'  | '8180'  | '8181'  | '8190'  | '8191'  | '9052'  | '82100' | '82101' |
| '82110' | '82111' | '82120' | '82121' | '82122' | '82123' | '82129' | '82130' | '82131' | '82132' | '82133' | '82139' | '8220'  | '8221'  |
| '82300' | '82301' | '82302' | '82310' | '82311' | '82312' | '82320' | '82321' | '82322' | '82330' | '82331' | '82332' | '82340' | '82341' |
| '82342' | '82380' | '82381' | '82382' | '82390' | '82391' | '82392' | '8240'  | '8241'  | '8242'  | '8243'  | '8244'  | '8245'  | '8246'  |
| '8247'  | '8248'  | '8249'  | '8250'  | '8251'  | '82520' | '82521' | '82522' | '82523' | '82524' | '82525' | '82529' | '82530' | '82531' |
| '82532' | '82533' | '82534' | '82535' | '82539' | '8260'  | '8261'  | '8270'  | '8271'  | '9054'  | '80500' | '80501' | '80502' | '80503' |
| '80504' | '80505' | '80506' | '80507' | '80508' | '80510' | '80511' | '80512' | '80513' | '80514' | '80515' | '80516' | '80517' | '80518' |
| '8052'  | '8053'  | '8054'  | '8055'  | '8056'  | '8057'  | '8058'  | '8059'  | '80700' | '80701' | '80702' | '80703' | '80704' | '80705' |
| '80706' | '80707' | '80708' | '80709' | '80710' | '80711' | '80712' | '80713' | '80714' | '80715' | '80716' | '80717' | '80718' | '80719' |
| '8072'  | '8073'  | '8074'  | '8075'  | '8076'  | '8080'  | '8081'  | '8082'  | '8083'  | '80841' | '80842' | '80843' | '80844' | '80849' |
| '80851' | '80852' | '80853' | '80854' | '80859' | '8088'  | '8089'  | '8090'  | '8091'  | '8280'  | '8281'  | '8290'  | '8291'  | '9051'  |
| '9055'  | '8400'  | '8401'  | '802'   | '8403'  | '8404'  | '8405'  | '8406'  | '8407'  | '8408'  | '8409'  | '8410'  | '8411'  | '8412'  |
| '8413'  | '8418'  | '8419'  | '84200' | '84201' | '84202' | '84209' | '84210' | '84211' | '84212' | '84213' | '84219' | '8430'  | '8431'  |
| '8431'  | '8438'  | '8439'  | '8440'  | '8441'  | '8442'  | '8443'  | '8448'  | '8449'  | '84500' | '84501' | '84502' | '84503' | '84509' |
| '84510' | '84511' | '84512' | '84513' | '84519' | '8460'  | '8461'  | '8462'  | '8463'  | '8468'  | '8469'  | '8470'  | '8471'  | '8472'  |
| '8473'  | '8474'  | '8479'  | '8480'  | '8481'  | '8482'  | '8483'  | '84840' | '84841' | '84842' | '84849' | '8485'  | '8488'  | '8489'  |
| '9057'  | 'V5414' | 'V5415' | 'V5416' | 'V5424' | 'V5425' | 'V5426' | 'V5410' | 'V5411' | 'V5412' | 'V5420' | 'V5421' | 'V5422' | 'V5417' |
| 'V5419' | 'V5427' | 'V5429' | 'V664'  | 'V674'  | 'V1352' | 'V540'  | 'V5401' | 'V5402' | 'V5409' | '82000' | '82001' | '82002' | '82003' |
| '82009' | '82010' | '82011' | '82012' | '82013' | '82019' | '82020' | '82021' | '82022' | '82030' | '82031' | '82032' | '8208'  | '8209'  |
| '9053'  | 'V5413' | 'V5423' | '80000' | '80001' | '80002' | '80003' | '80004' | '80005' | '80006' | '80009' | '80050' | '80051' | '80052' |
| '80053' | '80054' | '80055' | '80056' | '80059' | '80100' | '80101' | '80102' | '80103' | '80104' | '80105' | '80106' | '80109' | '80150' |
| '80151' | '80152' | '80153' | '80154' | '80155' | '80226' | '80227' | '80228' | '80229' | '80230' | '80231' | '80232' | '80233' | '80234' |
| '80235' | '80300' | '80301' | '80302' | '80303' | '80304' | '80305' | '80306' | '80309' | '80350' | '80351' | '80352' | '80353' | '80354' |
| '80355' | '80356' | '80359' | '80400' | '80401' | '80402' | '80403' | '80404' | '80405' | '80406' | '80409' | '80450' | '80451' | '80452' |
| '80453' | '80454' | '80455' | '80456' | '80459' | '9050'  | '80236' | '80237' | '80238' | '80239' | '8024'  | '8025'  | '8026'  | '8027'  |
| '8028'  | '8029'  | '80156' | '80159' | '8020'  | '8021'  | '80220' | '80221' | '80222' | '80223' | '80224' | '80225' | 34939'  | '80600' |
| '80601' | '80602' | '80603' | '80604' | '80605' | '80606' | '80607' | '80618' | '80608' | '80609' | '80610' | '80611' | '80612' | '80613' |
| '80614' | '80615' | '80616' | '80617' | '80619' | '80620' | '80621' | '80622' | '80623' | '80624' | '80625' | '80626' | '80627' | '80628' |
| '80629' | '80630' | '80631' | '80632' | '80633' | '80634' | '80635' | '80636' | '80637' | '80638' | '80639' | '8064'  | '8065'  | '80660' |
| '80661' | '80662' | '80669' | '80670' | '80671' | '80672' | '80679' | '8068'  | '8069'  | '9072'  | '95200' | '95201' | '95202' | '95203' |
| '95204' | '95205' | '95206' | '95207' | '95208' | '95209' | '95210' | '95211' | '95212' | '95213' | '95214' | '95215' | '95216' | '95217' |
| '95218' | '95219' | '9522'  | '9523'  | '9524'  | '9528'  | '9529'  |         |         |         |         |         |         |         |

Adapted from: HCUP CCS. Healthcare Cost and Utilization Project (HCUP). March 2017. Agency for Healthcare Research and Quality, Rockville, MD. [www.hcup-us.ahrq.gov/toolssoftware/ccs/ccs.jsp](http://www.hcup-us.ahrq.gov/toolssoftware/ccs/ccs.jsp). Accessed on 1/12/2018.

**eTable 5. Mental health disorders**

| Mental health condition               | CCS codes                | ICD-9 codes                                                                                                                                                                                                                                                                                                                                                                                                                                                                                                                                                                                                                                                                                                                                                                                                                                                                                                                                                                                      |
|---------------------------------------|--------------------------|--------------------------------------------------------------------------------------------------------------------------------------------------------------------------------------------------------------------------------------------------------------------------------------------------------------------------------------------------------------------------------------------------------------------------------------------------------------------------------------------------------------------------------------------------------------------------------------------------------------------------------------------------------------------------------------------------------------------------------------------------------------------------------------------------------------------------------------------------------------------------------------------------------------------------------------------------------------------------------------------------|
| Adjustment disorders                  | 650                      | 3090 3091 30922 30923 30924 30928 30929 3093 3094 30982 30983 30989 3099                                                                                                                                                                                                                                                                                                                                                                                                                                                                                                                                                                                                                                                                                                                                                                                                                                                                                                                         |
| Anxiety disorders                     | 651                      | 29384 30000 30001 30002 30009 30010 30020 30021 30022 30023 30029 3003<br>3005 30089 3009 3080 3081 3082 3083 3084 3089 30981 3130 3131 31321 31322<br>3133 31382 31383                                                                                                                                                                                                                                                                                                                                                                                                                                                                                                                                                                                                                                                                                                                                                                                                                          |
| Conduct disorders                     | 652                      | 31200 31201 31202 31203 31210 31211 31212 31213 31220 31221 31222 31223<br>3124 3128 31281 31282 31289 3129 31381 31400 31401 3141 3142 3148 3149                                                                                                                                                                                                                                                                                                                                                                                                                                                                                                                                                                                                                                                                                                                                                                                                                                                |
| Mood disorders                        | 657                      | 29383 29600 29601 29602 29603 29604 29605 29606 29610 29611 29612 29613<br>29614 29615 29616 29620 29621 29622 29623 29624 29625 29626 29630 29631<br>29632 29633 29634 29635 29636 29640 29641 29642 29643 29644 29645 29646<br>29650 29651 29652 29653 29654 29655 29656 29660 29661 29662 29663 29664<br>29665 29666 2967 29680 29681 29682 29689 29690 29699 3004 311                                                                                                                                                                                                                                                                                                                                                                                                                                                                                                                                                                                                                        |
| Schizophrenia & psychotic disorders   | 659                      | 29381 29382 29500 29501 29502 29503 29504 29505 29510 29511 29512 29513<br>29514 29515 29520 29521 29522 29523 29524 29525 29530 29531 29532 29533<br>29534 29535 29540 29541 29542 29543 29544 29545 29550 29551 29552 29553<br>29554 29555 29560 29561 29562 29563 29564 29565 29570 29571 29572 29573<br>29574 29575 29580 29581 29582 29583 29584 29585 29590 29591 29592 29593<br>29594 29595 2970 2971 2972 2973 2978 2979 2980 2981 2982 2983 2984 2988 2989                                                                                                                                                                                                                                                                                                                                                                                                                                                                                                                              |
| Alcohol related disorders             | 660                      | 2910 2911 2912 2913 2914 2915 2918 29181 29182 29189 2919 30300 30301 30302<br>30303 30390 30391 30392 30393 30500 30501 30502 30503 3575 4255 5353 53530<br>53531 5710 5711 5712 5713 76071 9800                                                                                                                                                                                                                                                                                                                                                                                                                                                                                                                                                                                                                                                                                                                                                                                                |
| Substance related disorders           | 661                      | 2920 29211 29212 2922 29281 29282 29283 29284 29285 29289 2929 30400<br>30401 30402 30403 30410 30411 30412 30413 30420 30421 30422 30423 30430<br>30431 30432 30433 30440 30441 30442 30443 30450 30451 30452 30453 30460<br>30461 30462 30463 30470 30471 30472 30473 30480 30481 30482 30483 30490<br>30491 30492 30493 30520 30521 30522 30523 30530 30531 30532 30533 30540<br>30541 30542 30543 30550 30551 30552 30553 30560 30561 30562 30563 30570<br>30571 30572 30573 30580 30581 30582 30583 30590 30591 30592 30593 64830<br>64831 64832 64833 64834 65550 65551 65553 76072 76073 76075 7795 96500<br>96501 96502 96509 V6542                                                                                                                                                                                                                                                                                                                                                      |
| Miscellaneous mental health disorders | 656<br>658<br>662<br>670 | 31230 31231 31232 31233 31234 31235 31239 3010 30110 30111 30112 30113<br>30120 30121 30122 3013 3014 30150 30151 30159 3016 3017 30181 30182 30183<br>30184 30189 3019 E9500 E9501 E9502 E9503 E9504 E9505 E9506 E9507 E9508<br>E9509 E9510 E9511 E9518 E9520 E9521 E9528 E9529 E9530 E9531 E9538 E9539 E954<br>E9550 E9551 E9552 E9553 E9554 E9555 E9556 E9557 E9559 E956 E9570 E9571 E9572<br>E9579 E9580 E9581 E9582 E9583 E9584 E9585 E9586 E9587 E9588 E9589 E959<br>V6284 29389 2939 30011 30012 30013 30014 30015 30016 30019 3006 3007 30081<br>30082 3021 3022 3023 3024 30250 30251 30252 30253 3026 30270 30271 30272<br>30273 30274 30275 30276 30279 30281 30282 30283 30284 30285 30289 3029 3060<br>3061 3062 3063 3064 30650 30651 30652 30653 30659 3066 3067 3068 3069 3071<br>30740 30741 30742 30743 30744 30745 30746 30747 30748 30749 30750 30751<br>30752 30753 30754 30759 30780 30781 30789 3101 316 64840 64841 64842 64843<br>64844 V402 V403 V4031 V4039 V409 V673 |

CCS=Clinical classification system code, ICD-9=International Classification of Diseases, Ninth Revision codes

Adapted from: HCUP CCS. Healthcare Cost and Utilization Project (HCUP). March 2017. Agency for Healthcare Research and Quality, Rockville, MD. [www.hcup-us.ahrq.gov/toolssoftware/ccs/ccs.jsp](http://www.hcup-us.ahrq.gov/toolssoftware/ccs/ccs.jsp). Accessed on 1/12/2018.

**eTable 6. Substance use disorders**

| Diagnoses           | ICD-9 and ICD-10 codes                                                                                                                                                                                                                                                                                                                                  |
|---------------------|---------------------------------------------------------------------------------------------------------------------------------------------------------------------------------------------------------------------------------------------------------------------------------------------------------------------------------------------------------|
| Drug abuse          | '3040' '3041' '3046' '3046' '3047' '3048' '3049' '3054' '3055' '3058' 'F1120' 'F1121' 'F1320' 'F1321' 'F1920' 'F1921' 'F1310' 'F1110' 'F1910'                                                                                                                                                                                                           |
| Overdose (others)   | '9658' '9659' '967' '9691' '9692' '9693' '9694' '9695' '9697' '9698' '9699' '9752' '9753' '9778' '9779' 'T400X1A' 'T400X2A' 'T400X3A' 'T400X4A' 'T403X1A' 'T403X2A' 'T403X3A' 'T403X4A' 'T402X1A' 'T402X2A' 'T402X3A' 'T402X4A' 'T404X1A' 'T404X2A' 'T404X3A' 'T404X4A' 'T40601A' 'T40602A' 'T40603A' 'T40604A' 'T40691A' 'T40692A' 'T40693A' 'T40694A' |
| Opioid overdose     | '96500' '96502' '96509' 'E8501' 'E8502'                                                                                                                                                                                                                                                                                                                 |
| Opioid use disorder | '30400' '30401' '30402' '30403' '30470' '30471' '30472' '30473' '30550' '30551' '30552' '30553'                                                                                                                                                                                                                                                         |
| Tobacco             | '3051' 'V1582'                                                                                                                                                                                                                                                                                                                                          |
| Alcohol             | '3050' '3039' '2652' '3030' '3039' '3050' '3575' '4255' '5353' '980x' 'V113', '2911' - '2913', '2915' - '2919', '5710' - '5713'                                                                                                                                                                                                                         |
| Marijuana           | '3043' '3052' '3043' '30430' '30431' '30432' '30433'                                                                                                                                                                                                                                                                                                    |
| Cocaine             | '3056' '3042' '30420' '30421' '30422' '30423'                                                                                                                                                                                                                                                                                                           |
| Other substance use | '3053', '3054', '3057', '3058', '3059'                                                                                                                                                                                                                                                                                                                  |

**eTable 7. List of Medical Comorbidities and ICD-9 Codes used to calculate the Charlson Co-morbidity index**

| Medical Conditions                    | ICD-9 codes                                                                                                                               |
|---------------------------------------|-------------------------------------------------------------------------------------------------------------------------------------------|
| Congestive Heart Failure              | '39891', '4254', '4255', '4257', '4258', '4259', '428'                                                                                    |
| Myocardial infarction                 | '410' '412'                                                                                                                               |
| Peripheral Vascular Disease           | '0930', '440', '441', '7854', 'V434', '4420'-'4428', '4431'-'4439', '44770'-'44773'                                                       |
| Chronic Obstructive Pulmonary Disease | '4168', '4169', '5064', '5191', '490' - '496', '500' - '505'                                                                              |
| Diabetes Mellitus                     | '250' , '2500' - '2503'                                                                                                                   |
| Diabetes Mellitus with complications  | '3620', '2504', '2509'                                                                                                                    |
| Chronic Kidney Disease                | '40301', '40311', '40391', '40402', '40403', '40412', '40413', '40492', '40493', '582', '583', '585', '586', '588', 'V420', 'V451', 'V56' |
| Cardiovascular disease                | '430' - '438'                                                                                                                             |
| Dementia                              | '290', '2910', '2911', '2912', '29282', '2941', '3310', '3311', '3312', '33182'                                                           |
| Liver Disease                         | '07022', '07023', '07044', 'V427', '4560' - '4562', '5722' - '5728'                                                                       |
| Cirrhosis                             | '07032', '07033', '07054', '5712', '5714', '5715', '5716'                                                                                 |
| Ulcers                                | '531' - '534'                                                                                                                             |
| Rheumatoid arthritis                  | '7100', '7101', '7104', '71481', '725' , ('7140' - '7142'                                                                                 |
| Paralysis                             | '342', '3449', '3440' - '3446'                                                                                                            |
| AIDS                                  | '79571', 'V08', '042' - '044'                                                                                                             |

**eTable 8. Rates of selected conditions diagnosed within 6 months of death by initial pattern of prescription opioid supply among 15,630 decedents in the study cohort**

| Condition              | Total        | Non-daily opioid supply<br>(N=13,377) | Daily opioid supply<br>(N=2,253) | p-value |
|------------------------|--------------|---------------------------------------|----------------------------------|---------|
| Substance use disorder | 37 (0.24)    | 27 (0.02)                             | 10 (0.44)                        | 0.0288  |
| Overdose (others)      | 57 (0.36)    | 43 (0.32)                             | 14 (0.62)                        | 0.0289  |
| Opioid overdose        | 14 (0.09)    | 11 (0.08)                             | 12 (0.53)                        | < 0.001 |
| Myocardial infarction  | 1,267 (8.11) | 1,144 (8.55)                          | 123 (5.46)                       | 0.003   |
| Cancer                 | 897 (5.74)   | 743 (5.55)                            | 154 (6.84)                       | 0.0156  |
| MOUD                   | 6 (0.05)     | 6 (0.04)                              | 1 (0.02)                         | 0.3147  |
| Hospice care           | 826 (5.28)   | 713 (5.33)                            | 113 (5.02)                       | 0.5370  |

MI= Myocardial infarction, MOUD=Medication-based treatment for opioid use disorder

**eTable 9. Categories of last medical diagnosis during the 6 months prior to death among 15,630 decedents in the study cohort (Based on ICD-9/ICD-10 codes only)**

| Medical Conditions                   | N (%)               |
|--------------------------------------|---------------------|
| Cardiac conditions                   | 1,583 (17.38)       |
| Cancer and cancer-related conditions | 1,570 (17.16)       |
| Respiratory disorders                | 1,505 (16.43)       |
| Septicemia and other infections      | 1,179 (12.93)       |
| Stroke and other CNS conditions      | 1,013 (11.18)       |
| Others                               | 702 (7.53)          |
| Kidney failure/electrolytes problems | 449 (5.03)          |
| Gastrointestinal disorders           | 365 (4.59)          |
| Fractures and other pain conditions  | 345 (4.23)          |
| Hematologic disorders                | 129 (2.27)          |
| <b>Total</b>                         | <b>8,840 (100%)</b> |

CNS=Central nervous system

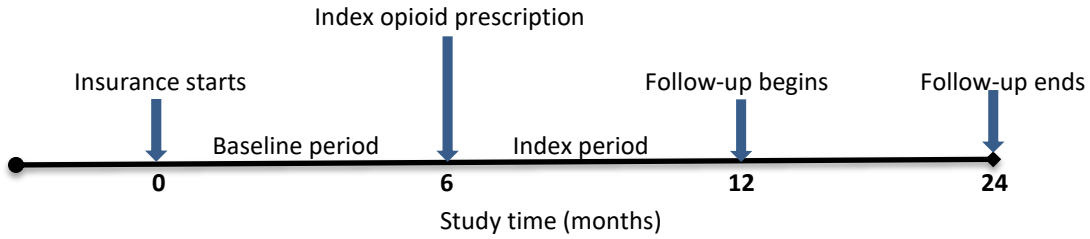

eFigure 1. Study timeline for patients selected into the study cohort

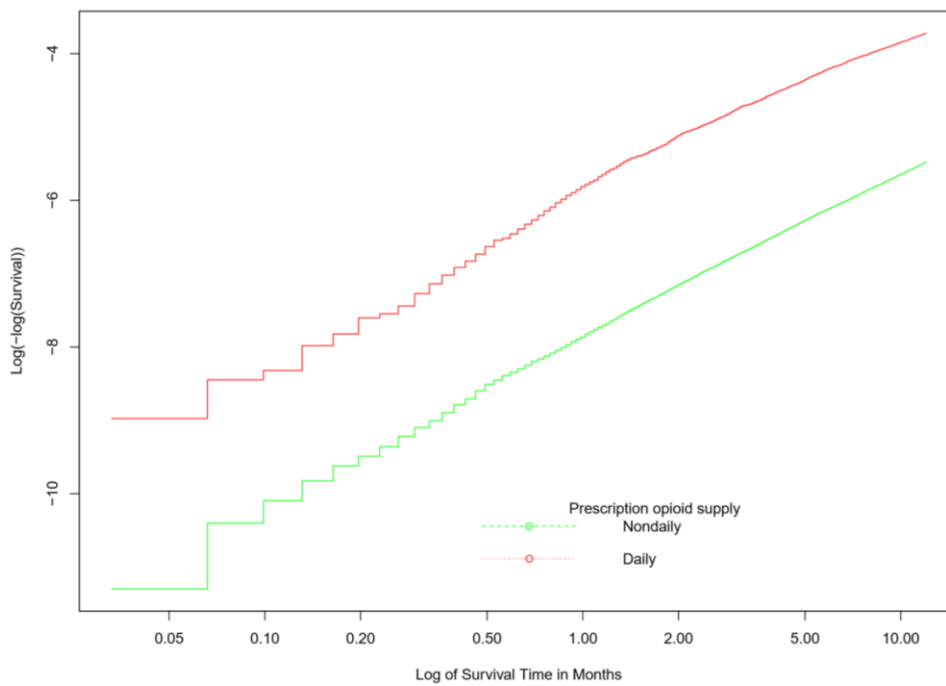

eFigure 2. Complementary log-log plot for the two patterns of prescription opioid supply showing parallel curves separated by a constant at all time points
